# Supplementary material for: Genome Wide Identification of SARS-CoV Susceptibility Loci Using the Collaborative Cross
Source: PLoS Genet. 2015 Oct 9;11(10):e1005504. doi: 10.1371/journal.pgen.1005504 (PMC4599853; doi:10.1371/journal.pgen.1005504)
Supplement: S2 Dataset — (XLSX) [file pgen.1005504.s010.xlsx]

## Sheet: weight and titer
mouse/cage #	strain	virus	Day 0	Day 1	Day 2	Day 3	Day 4		Titer
1.1	B6	SARS-CoV	100	100	87.1345
1.2	B6	SARS-CoV	100	96.8254	85.1852
1.3	B6	SARS-CoV	100	97.7143	86.8571
1.4	B6	SARS-CoV	100	97.861	87.1658	81.8182	80.2139		3650000
2.1	B6	SARS-CoV	100	97.8495	88.172	83.871	88.7097		335000
2.2	B6	SARS-CoV	100	97.7778	86.6667	83.3333	88.3333		400000
2.3	B6	mock	100	100.529	100
2.4	B6	mock	100	98.324	99.4413
3.1	B6	mock	100	97.0588	101.176
3.2	B6	mock	100	98.3516	100	101.648	104.945		0
3.3	B6	mock	100	98.8636	102.273	102.841	102.841		0
4.1	Trim55	SARS-CoV	100	99.5283	86.7925
4.2	Trim55	SARS-CoV	100	98.5714	86.6667
4.3	Trim55	SARS-CoV	100	95.0226	86.4253
4.4	Trim55	SARS-CoV	100	95.814	84.6512	79.0698	85.5814		1500000
5.1	Trim55	SARS-CoV	100	100.926	90.2778	82.8704	87.963		4000000
5.2	Trim55	SARS-CoV	100	98.2301	85.8407	82.3009	86.2832		9100000
5.3	Trim55	mock	100	101.316	102.632
5.4	Trim55	mock	100	103.67	100.917
5.5	Trim55	mock	100	100.935	101.402
6.1	Trim55	mock	100	98.0198	99.505	99.0099	98.0198		0
6.1	Trim55	mock	100	95.0495	97.5248	97.0297	97.0297		0
5.1	B6	10^5	100	98.7805	95.122	89.0244	93.9024		300000
5.2	B6	10^5	100	95.2663	91.1243	88.1657	93.4911		not determined
5.3	B6	10^5	100	97.7654	93.2961	85.4749	89.3855		3650000
5.4	B6	10^5	100	97.8142	92.8962	87.4317	89.071		335000
6.1	B6	mock	100	96.732	100.654	100.654	101.961		0
6.2	B6	mock	100	98.8764	98.8764	98.8764	98.8764		0
6.3	B6	mock	100	97.7273	98.8636	102.273	103.409		0
7.1	Trim55	10^5	100	95.5665	88.1773	80.7882	83.2512		110000
7.2	Trim55	10^5	100	96.861	87.8924	82.5112	85.6502		1500000
7.3	Trim55	10^5	100	94.9541	90.367	82.5688	88.9908		800000
7.4	Trim55	10^5	100	96.6019	88.835	82.0388	83.9806		9100000
7.5	Trim55	mock	100	95.7143	97.1429	98.5714	100.476		0
8.1	Trim55	mock	100	96.8085	102.128	103.191	101.596		0
9.1	Trim55	mock	100	98.5714	100	101.429	100.952		0
mouse/cage #	strain	virus	Day 0	Day 1	Day 2	Day 3	Day 4
1.1	B6	SARS-CoV	100	99.0909	88.6364	88.6364	96.3636		not determined
1.2	B6	SARS-CoV	100	96.7742	88.3065	82.6613	81.0484		not determined
1.3	B6	SARS-CoV	100	98.1395	88.3721	82.3256	83.2558		not determined
1.4	B6	SARS-CoV	100	100.392	90.1961	98.4314	100.392		not determined
1.5	B6	mock	100	97.9757	98.7854	100.405	101.619		not determined
2.1	B6	SARS-CoV	100	97.4874	85.4271	86.4322	93.9698		not determined
2.2	B6	SARS-CoV	100	100	87.1134	87.6289	93.299		not determined
2.3	B6	SARS-CoV	100	101.13	87.5706	93.2203	100.565		not determined
3.1	B6	SARS-CoV	100	98.8372	88.3721	89.5349	97.6744		not determined
3.2	B6	SARS-CoV	100	98.9189	87.5676	89.1892	97.2973		not determined
3.3	B6	SARS-CoV	100	97.2527	87.3626	90.1099	94.5055		not determined
4.1	Trim55	SARS-CoV	100	98.4314	90.9804	95.6863	99.2157		not determined
4.2	Trim55	SARS-CoV	100	95.7854	88.8889	94.636	93.8697		not determined
4.3	Trim55	SARS-CoV	100	96.4567	87.7953	90.5512	96.063		not determined
4.4	Trim55	SARS-CoV	100	96.5909	88.6364	101.136	104.545		not determined
4.5	Trim55	mock	100	99.6226	99.2453	99.6226	100.377		not determined
5.1	Trim55	SARS-CoV	100	94.8052	85.2814	83.5498	87.013		not determined
5.2	Trim55	SARS-CoV	100	97	87.5	82.5	88		not determined
5.3	Trim55	SARS-CoV	100	95.5752	85.3982	83.1858	87.1681		not determined
6.1	Trim55	SARS-CoV	100	88.0829	86.5285	89.6373	93.2642		not determined
6.2	Trim55	SARS-CoV	100	94.1748	84.9515	86.4078	90.2913		not determined
6.3	Trim55	SARS-CoV	100	94.6602	85.9223	88.3495	90.2913		not determined
mouse/cage #	strain	virus	Day 0	Day 1	Day 2	Day 3	Day 4		not determined
1.1	B6	10^5	100	95.9302	84.8837	82.5581	87.2093		not determined
1.2	B6	10^5	100	96.3918	87.1134	82.4742	85.567		not determined
1.3	B6	10^5	100	97.3822	88.4817	83.7696	89.0052		not determined
1.4	B6	10^5	100	98.2353	88.8235	84.7059	91.1765		not determined
1.5	B6	10^5	100	97.5728	86.4078	81.5534	83.0097		not determined
2.1	B6	10^5	100	100	89.7297	88.1081	90.8108		not determined
2.2	B6	mock	100	95.5446	99.0099	99.505	103.465		not determined
2.3	B6	mock	100	96.7391	97.2826	96.7391	97.2826		not determined
2.4	B6	mock	100	101.07	98.3957	99.4652	102.139		not determined
2.5	B6	mock	100	97.9167	97.3958	95.8333	98.9583		not determined
3.1	Trim55	10^5	100	98.0488	90.7317	85.3659	87.8049		not determined
3.2	Trim55	10^5	100	95.9641	89.2377	80.7175	78.0269		not determined
3.3	Trim55	10^5	100	99.5146	93.6893	84.9515	83.0097		not determined
4.1	Trim55	10^5	100	97.6096	86.4542	81.6733	82.8685		not determined
4.2	Trim55	10^5	100	98.7342	88.6076	82.7004	81.4346		not determined
4.3	Trim55	10^5	100	99.569	91.8103	83.1897	83.6207		not determined
5.1	Trim55	mock	100	98.5507	99.0338	101.449	104.348		not determined
5.2	Trim55	mock	100	97.1154	99.0385	99.0385	103.365		not determined
5.3	Trim55	mock	100	95.2153	97.1292	97.1292	100.478		not determined
5.4	Trim55	mock	100	98.1043	98.5782	97.6303	99.5261		not determined

## Sheet: histology scoring
mouse ID	strain	virus	vascular cuffing score
1.1	B6	SARS-CoV	0.875
1.2	B6	SARS-CoV	0.875		Average
1.3	B6	SARS-CoV	1.75		1.15
1.4	B6	SARS-CoV	1.25
1.5	B6	SARS-CoV	1
3.1	Trim55-/-	SARS-CoV	0.75
3.2	Trim55-/-	SARS-CoV	0.5
3.3	Trim55-/-	SARS-CoV	0.5		Average
4.1	Trim55-/-	SARS-CoV	0.625		0.6875
4.2	Trim55-/-	SARS-CoV	1
4.3	Trim55-/-	SARS-CoV	0.75
mouse ID	sex	strain	virus	slide 1	slide 2
1.1	male	B6	SARS-CoV	1.25	1.5
1.2	male	B6	SARS-CoV	0.5	0.75	B6	1.025
1.3	male	B6	SARS-CoV	1	1.25
1.4	male	B6	SARS-CoV	0.75	0.75
1.5	male	B6	mock	0	0
2.1	female	B6	SARS-CoV	0.75	1
2.2	female	B6	SARS-CoV	0.75	0.75
2.3	female	B6	SARS-CoV	1.25	1.5
3.1	female	B6	SARS-CoV	0.75	1
3.2	female	B6	SARS-CoV	1.25	1.25
3.3	female	B6	SARS-CoV	1.25	1.25
4.1	male	Trim55 -/-	SARS-CoV	0.5	0.5
4.2	male	Trim55 -/-	SARS-CoV	0.75	0.75
4.3	male	Trim55 -/-	SARS-CoV	0.5	0.5
4.4	male	Trim55 -/-	SARS-CoV	1	1
4.5	male	Trim55 -/-	mock	0	0	Trim55	0.777778
5.2	female	Trim55 -/-	SARS-CoV	1	1.25
5.3	female	Trim55 -/-	SARS-CoV	1	1
6.1	female	Trim55 -/-	SARS-CoV	0.75	0.5
6.2	female	Trim55 -/-	SARS-CoV	0.75	0.75
6.3	female	Trim55 -/-	SARS-CoV	0.75	0.75
1.1	SARS-CoV	B6	day 2
1.2	SARS-CoV	B6	day 2
1.3	SARS-CoV	B6	day 2
1.4	SARS-CoV	B6	1.25
2.1	SARS-CoV	B6	1.25
2.2	SARS-CoV	B6	0.75
2.3	mock	B6	day 2		B6	1.08333
2.4	mock	B6	day 2
3.1	mock	B6	day 2
3.2	mock	B6	0
3.3	mock	B6	0
4.1	SARS-CoV	Trim55	day 2
4.2	SARS-CoV	Trim55	day 2
4.3	SARS-CoV	Trim55	day 2
4.4	SARS-CoV	Trim55	1		Trim55	0.75
5.1	SARS-CoV	Trim55	0.75
5.2	SARS-CoV	Trim55	0.5
5.3	mock	Trim55	day 2
5.4	mock	Trim55	day 2
5.5	mock	Trim55	day 2
6.1	mock	Trim55	0
6.1	mock	Trim55	0

## Sheet: FACS macrophage monocyte panel
SARSaug16LGsummary.xls
			m1	m2	m3	m4	m5	m6	m7	m8	m9	m10	m11	m12	m13	m14	m15	m16	m17	m18	m19	m20
																															% viable cells	% LCA+, AF cells	% CD11c+ cells	% neutrophils	% SigLecF+ cells	% eosinophils	% AM's	% pDCs	% MoDCs	% CD11b hi DCs	% AF- cells	% monocytes	% lymphocytes	MFI for AM's	Log MFI	# total viable cells	% Ly-6C low	%Ly-6C hi
		Gate	Count	Count	Count	Count	Count	Count	Count	Count	Count	Count	Count	Count	Count	Count	Count	Count	Count	Count	Count	Count
		Total	32799	35402	34939	30296	13765	29378	25412	23806	32151	6020	36540	36362	28307	29462	20161	36585	10526	14399	19971	20717					1-1	B6	10^5		0.872324	0.164832	0.158832	0.0250556	0.0718592	0.0552394	0.0166198	0.000343824	0.031133	0.0167505	0.490903	0.120353	0.375664	584.82	2.76702	206501	0.0786388	0.042455	0.649404
	neutrophils	R6	5174	7578	7248	4784	2265	5984	6053	6774	7933	816	9149	9016	6292	5497	3031	11313	2579	2594	5098	5168					1-2	B6	10^5		0.889655	0.152338	0.145952	0.0312418	0.043313	0.0303224	0.0129906	0.000136049	0.0456176	0.0124258	0.558563	0.10773	0.455174	623.3	2.7947	242560	0.0696859	0.0389306	0.641577
	SigLecF+ cells	R7	14839	10506	12621	13456	7444	10858	11319	10913	13586	2626	15164	8223	10130	14811	8390	7814	5162	7814	8988	9526					1-3	B6	10^5		0.847966	0.167663	0.162726	0.0337572	0.0587816	0.0457361	0.0130455	0.000209585	0.0451353	0.0123096	0.478026	0.126529	0.354804	522.57	2.71814	214710	0.0819338	0.0455219	0.642841
																											1-4	B6	10^5		0.867018	0.135761	0.130468	0.020602	0.0579475	0.0420438	0.0159037	0.000249774	0.0323845	0.00956462	0.475953	0.103527	0.375729	604.83	2.78163	232210	0.0709229	0.033418	0.679723
		Total	206501	242560	214710	232210	64200	173926	189354	86381	233126	31481	176534	208855	200234	178422	137023	260569	49558	64415	70443	93960					1-5	B6	10^5		0.818283	0.221526	0.214408	0.0352804	0.11595	0.0936916	0.0222586	0.00046729	0.0409034	0.0109813	0.447212	0.115312	0.336449	493.2	2.69302	64200	0.0707632	0.0451869	0.61029
	LCA+, non-AF cells	R3	101372	135485	102637	110521	28711	83867	66493	30731	96710	12286	97370	99927	87145	101364	74917	150620	17763	25917	26896	38773					2-1	B6	10^5		0.843801	0.174172	0.168911	0.0344054	0.0624288	0.0481009	0.0143279	0.000172487	0.0437427	0.0160183	0.482199	0.123392	0.363264	614.09	2.78823	173926	0.0780964	0.0462266	0.628174
	LCA+, autoflu cells	R4	34038	36951	35999	31525	14222	30293	26436	24616	33349	6254	37337	37659	29136	31120	20789	38221	10760	14903	20602	21630					2-2	B6	mock		0.83675	0.139612	0.134204	0.0319666	0.0597769	0.0175597	0.0422172	0.000396084	0.0239129	0.00932117	0.351157	0.088015	0.266237	155.98	2.19307	189354	0.059365	0.0291201	0.670904
																											2-3	B6	mock		0.79794	0.28497	0.275593	0.07842	0.126336	0.0521179	0.0742177	0.00082194	0.0421157	0.0125143	0.355761	0.0934465	0.264688	135.74	2.13271	86381	0.0488186	0.0451835	0.519335
	alveolar mac's	Total	3432	3151	2801	3693	1429	2492	7994	6411	7676	1442	2864	2142	2001	2437	2685	3886	3594	5313	6375	6150					2-4	B6	mock		0.843513	0.143051	0.137913	0.0340288	0.0582775	0.0253511	0.0329264	0.000227345	0.02569	0.010282	0.41484	0.0442722	0.372657	157.44	2.19712	233126	0.0292589	0.0153908	0.655298
																											2-5	B6	mock		0.745819	0.19866	0.191226	0.0259204	0.0834154	0.03761	0.0458054	0.000349417	0.043423	0.0243957	0.390267	0.122868	0.270639	153.65	2.18653	31481	0.0724564	0.0510784	0.586526
		Total	287459	332622	301778	324755	97448	250319	271809	126407	325277	51123	247030	301864	297335	246339	210741	373300	68137	93758	103352	135580					3-1	Murf2	10^5		0.887761	0.2115	0.206986	0.0518257	0.0858985	0.069675	0.0162235	0.000192597	0.0437819	0.0106948	0.551565	0.0993916	0.457317	584.06	2.76646	176534	0.0569635	0.0431135	0.569197
	singlets	R1	236725	272645	253206	267826	78457	206122	226297	108255	276375	42210	198853	242791	230147	198841	166500	297686	59661	79756	88272	117142					3-2	Murf2	10^5		0.860225	0.180312	0.174102	0.0431687	0.0393718	0.0291159	0.0102559	0.000177156	0.0635321	0.0129803	0.478452	0.110828	0.371353	523.78	2.71915	208855	0.0694118	0.0424361	0.620591
																											3-3	Murf2	10^5		0.870027	0.14551	0.14137	0.0314232	0.0505908	0.0405975	0.00999331	0.000169801	0.0378108	0.0100333	0.435216	0.0756914	0.362131	554.5	2.7439	200234	0.0480688	0.0283418	0.629085
		Total	101372	135485	102637	110521	28711	83867	66493	30731	96710	12286	97370	99927	87145	101364	74917	150620	17763	25917	26896	38773					4-1	Murf2	10^5		0.89731	0.174418	0.165125	0.030809	0.0830111	0.0693524	0.0136586	0.000123303	0.0260394	0.00918048	0.568114	0.0983063	0.47901	502.13	2.70082	178422	0.0522413	0.0469897	0.526461
	monocytes	R12	24853	26131	27167	24040	7403	21461	16666	8072	10321	3868	17546	23147	15156	17540	13787	24514	3580	6031	6010	7720					4-2	Murf2	10^5		0.822961	0.151719	0.147136	0.0221204	0.0612306	0.0416353	0.0195953	0.000357604	0.037439	0.0164644	0.546748	0.100618	0.450764	588.13	2.76947	137023	0.0566766	0.0446202	0.55951
	lymphocytes	R13	77575	110407	76180	87248	21600	63181	50413	22864	86876	8520	80732	77559	72511	85466	61765	127043	14278	20086	21049	31291					4-3	Murf2	10^5		0.875315	0.146683	0.140404	0.0434165	0.0299882	0.0150747	0.0149135	9.97816e-05	0.0440344	0.0108608	0.578043	0.0940787	0.48756	652.08	2.8143	260569	0.0609819	0.0339104	0.642643
																											5-1	Murf2	mock		0.83066	0.217119	0.212398	0.05204	0.104161	0.0316397	0.0725211	0.000827313	0.0290165	0.0167481	0.358429	0.0722386	0.288107	163.54	2.21362	49558	0.0386819	0.0339804	0.532352
		Total	12738	17298	15039	12013	4032	12533	7970	6076	10635	2581	12227	19099	11867	9155	8715	17451	2748	3945	5861	5985					5-2	Murf2	mock		0.807651	0.231359	0.223535	0.0402701	0.121307	0.0388264	0.0824808	0.000853838	0.0275867	0.0215943	0.402344	0.0936273	0.311822	135.97	2.13344	64415	0.0515563	0.0425212	0.54802
	MoDC's	R10	6429	11065	9691	7520	2626	7608	4528	3638	5989	1367	7729	13269	7571	4646	5130	11474	1438	1777	3497	3056					5-3	Murf2	mock		0.798022	0.292463	0.283506	0.0723706	0.127593	0.0370938	0.0904987	0.000553639	0.049643	0.0153883	0.381812	0.0853172	0.298809	123.98	2.09335	70443	0.0426728	0.0429993	0.498094
	CD11b hi DC's	R11	3459	3014	2643	2221	705	2786	1765	1081	2397	768	1888	2711	2009	1638	2256	2830	830	1391	1084	1891					5-4	Murf2	mock		0.802103	0.230204	0.220487	0.0550021	0.101384	0.0359302	0.0654534	0.000585355	0.0325245	0.0201256	0.412654	0.0821626	0.333025	131.45	2.11876	93960	0.0374415	0.0451469	0.453351
		Total	236725	272645	253206	267826	78457	206122	226297	108255	276375	42210	198853	242791	230147	198841	166500	297686	59661	79756	88272	117142									% viable cells	% LCA+, AF cells	% CD11c+ cells	% neutrophils	% SigLecF+ cells	% eosinophils	% AM's	% pDCs	% MoDCs	% CD11b hi DCs	% AF- cells	% monocytes	% lymphocytes	MFI for AM's	Log MFI	# total viable cells	% Ly-6C low	%Ly-6C hi
	viable cells	R2	206501	242560	214710	232210	64200	173926	189354	86381	233126	31481	176534	208855	200234	178422	137023	260569	49558	64415	70443	93960								B6 inf	0.856508	0.169382	0.16355	0.0300571	0.0683801	0.0525224	0.0158577	0.000263168	0.0398194	0.0130084	0.488809	0.11614	0.376847	573.802	2.75713	189018	0.0750068	0.0419565	0.642002
																														B6 mock	0.806005	0.191573	0.184734	0.042584	0.0819514	0.0331597	0.0487917	0.000448696	0.0337854	0.0141283	0.378006	0.0871504	0.293555	150.703	2.17736	135086	0.0524747	0.0351932	0.608016
		Total	34038	36951	35999	31525	14222	30293	26436	24616	33349	6254	37337	37659	29136	31120	20789	38221	10760	14903	20602	21630								Murf2 inf	0.868933	0.168357	0.16252	0.0371273	0.0583485	0.0442418	0.0141067	0.000186707	0.0421063	0.0117024	0.526356	0.0964857	0.434689	567.447	2.75235	193606	0.0573907	0.039902	0.591248
	CD11c+ cells	R5	32799	35402	34939	30296	13765	29378	25412	23806	32151	6020	36540	36362	28307	29462	20161	36585	10526	14399	19971	20717								Murf2 mock	0.809609	0.242787	0.234981	0.0549207	0.113611	0.0358725	0.0777385	0.000705037	0.0346927	0.0184641	0.38881	0.0833364	0.307941	138.735	2.13979	69594	0.0425881	0.0411619	0.507954
		Total	24853	26131	27167	24040	7403	21461	16666	8072	10321	3868	17546	23147	15156	17540	13787	24514	3580	6031	6010	7720									0.419937	0.94959	0.948829	0.200406	0.485078	0.525244	0.415134	0.25086	0.699166	0.428262	0.209427	0.00904005	0.066494	0.840746	0.844418	0.888032	0.000994307	0.579284	0.0450306
	Ly-6C low monocytes	R14	16239	16903	17592	16469	4543	13583	11241	4217	6821	2281	10056	14497	9625	9321	7766	15890	1917	3321	3006	3518
	Ly-6C high monocytes	R15	8767	9443	9774	7760	2901	8040	5514	3903	3588	1608	7611	8863	5675	8384	6114	8836	1684	2739	3029	4242
																															No. of Cells
		Total	12809	17331	15084	12071	4062	12563	8045	6147	10688	2592	12261	19136	11901	9177	8764	17477	2789	4000	5900	6040									Recovered	% LCA+, AF cells	% CD11c+ cells	% neutrophils	% SigLecF+ cells	% eosinophils	% AM's	% pDCs	% MoDCs	% CD11b hi DCs	% AF- cells	% monocytes	% lymphocytes	MFI for AM's	Log MFI	# total viable cells	% Ly-6C low	%Ly-6C hi
	pDCs	R9	71	33	45	58	30	30	75	71	53	11	34	37	34	22	49	26	41	55	39	55
																											1-1	B6	10^5		1738750	286602	276169	43565.4	124945	96047.6	28897.6	597.824	54132.5	29125	853558	209264	653186				136733	73818.6
		Total	14839	10506	12621	13456	7444	10858	11319	10913	13586	2626	15164	8223	10130	14811	8390	7814	5162	7814	8988	9526					1-2	B6	10^5		3336250	508236	486931	104230	144503	101163	43339.9	453.893	152192	41455.5	1.86351e+06	359414	1.51857e+06				232489	129882
	eosinophils	R8	11407	7355	9820	9763	6015	8366	3325	4502	5910	1184	12300	6081	8129	12374	5705	3928	1568	2501	2613	3376					1-3	B6	10^5		3105000	520595	505266	104816	182517	142011	40506.3	650.761	140145	38221.4	1.48427e+06	392872	1.10167e+06				254404	141345
			3432																								1-4	B6	10^5		2158750	293073	281648	44474.7	125094	90762.1	34332.1	539.199	69910	20647.6	1.02746e+06	223489	811105				153105	72141.2
	MFI for AM's		584.82	623.3	522.57	604.83	493.2	614.09	155.98	135.74	157.44	153.65	584.06	523.78	554.5	502.13	588.13	652.08	163.54	135.97	123.98	131.45					1-5	B6	10^5		1175000	260294	251930	41454.4	136241	110088	26153.8	549.065	48061.5	12903	525474	135491	395327				83146.8	53094.6
																											2-1	B6	10^5		4140000	721071	699291	142439	258455	199138	59317.6	714.097	181095	66315.8	1.99631e+06	510841	1.50391e+06				323319	191378
																											2-2	B6	mock		535000	74692.2	71799	17102.1	31980.7	9394.44	22586.2	211.905	12793.4	4986.82	187869	47088	142437				31760.3	15579.2
	% viable cells		0.872324	0.889655	0.847966	0.867018	0.818283	0.843801	0.83675	0.79794	0.843513	0.745819	0.887761	0.860225	0.870027	0.89731	0.822961	0.875315	0.83066	0.807651	0.798022	0.802103					2-3	B6	mock		235000	66968	64764.4	18428.7	29688.9	12247.7	17441.2	193.156	9897.2	2940.87	83603.9	21959.9	62201.6				11472.4	10618.1
	% LCA+, AF cells		0.164832	0.152338	0.167663	0.135761	0.221526	0.174172	0.139612	0.28497	0.143051	0.19866	0.2115	0.180312	0.14551	0.174418	0.151719	0.146683	0.217119	0.231359	0.292463	0.230204					2-4	B6	mock		1738750	248731	239795	59167.6	101330	44079.2	57250.8	395.296	44668.4	17877.8	721303	76978.3	647957				50873.8	26760.8
	% CD11c+ cells		0.158832	0.145952	0.162726	0.130468	0.214408	0.168911	0.134204	0.275593	0.137913	0.191226	0.206986	0.174102	0.14137	0.165125	0.147136	0.140404	0.212398	0.223535	0.283506	0.220487					2-5	B6	mock		1293750	257016	247399	33534.5	107919	48657.9	59260.7	452.058	56178.5	31561.9	504908	158960	350140				93740.5	66082.7
	% neutrophils		0.0250556	0.0312418	0.0337572	0.020602	0.0352804	0.0344054	0.0319666	0.07842	0.0340288	0.0259204	0.0518257	0.0431687	0.0314232	0.030809	0.0221204	0.0434165	0.05204	0.0402701	0.0723706	0.0550021					3-1	Murf2	10^5		470000	99405.2	97283.2	24358.1	40372.3	32747.2	7625.05	90.5208	20577.5	5026.57	259236	46714.1	214939				26772.9	20263.3
	% SigLecF+ cells		0.0718592	0.043313	0.0587816	0.0579475	0.11595	0.0624288	0.0597769	0.126336	0.0582775	0.0834154	0.0858985	0.0393718	0.0505908	0.0830111	0.0612306	0.0299882	0.104161	0.121307	0.127593	0.101384					3-2	Murf2	10^5		4988750	899530	868550	215358	196416	145252	51164.2	883.789	316946	64755.5	2.38688e+06	552894	1.85259e+06				346278	211703
	% eosinophils		0.0552394	0.0303224	0.0457361	0.0420438	0.0936916	0.0481009	0.0175597	0.0521179	0.0253511	0.03761	0.069675	0.0291159	0.0405975	0.0693524	0.0416353	0.0150747	0.0316397	0.0388264	0.0370938	0.0359302					3-3	Murf2	10^5		6523750	949269	922260	204997	330042	264848	65193.8	1107.74	246668	65454.5	2.83924e+06	493792	2.36245e+06				313589	184895
	% AM's		0.0166198	0.0129906	0.0130455	0.0159037	0.0222586	0.0143279	0.0422172	0.0742177	0.0329264	0.0458054	0.0162235	0.0102559	0.00999331	0.0136586	0.0195953	0.0149135	0.0725211	0.0824808	0.0904987	0.0654534					4-1	Murf2	10^5		646250	112718	106712	19910.3	53645.9	44819	8826.89	79.6847	16828	5932.89	367144	63530.4	309560				33761	30367.1
	% pDCs		0.000343824	0.000136049	0.000209585	0.000249774	0.00046729	0.000172487	0.000396084	0.00082194	0.000227345	0.000349417	0.000192597	0.000177156	0.000169801	0.000123303	0.000357604	9.97816e-05	0.000827313	0.000853838	0.000553639	0.000585355					4-2	Murf2	10^5		652500	98996.7	96006.2	14433.5	39953	27167.1	12785.9	233.337	24428.9	10743	356753	65653.3	294123				36981.5	29114.7
	% MoDCs		0.031133	0.0456176	0.0451353	0.0323845	0.0409034	0.0437427	0.0239129	0.0421157	0.02569	0.043423	0.0437819	0.0635321	0.0378108	0.0260394	0.037439	0.0440344	0.0290165	0.0275867	0.049643	0.0325245					4-3	Murf2	10^5		1203750	176569	169012	52262.6	36098.3	18146.2	17952.1	120.112	53006.4	13073.7	695819	113247	586900				73407	40819.6
	% CD11b hi DCs		0.0167505	0.0124258	0.0123096	0.00956462	0.0109813	0.0160183	0.00932117	0.0125143	0.010282	0.0243957	0.0106948	0.0129803	0.0100333	0.00918048	0.0164644	0.0108608	0.0167481	0.0215943	0.0153883	0.0201256					5-1	Murf2	mock		117500	25511.5	24956.7	6114.7	12238.9	3717.66	8521.23	97.2093	3409.44	1967.9	42115.3	8488.03	33852.6				4545.13	3992.7
	% AF- cells		0.490903	0.558563	0.478026	0.475953	0.447212	0.482199	0.351157	0.355761	0.41484	0.390267	0.551565	0.478452	0.435216	0.568114	0.546748	0.578043	0.358429	0.402344	0.381812	0.412654					5-2	Murf2	mock		58750	13592.4	13132.7	2365.87	7126.8	2281.05	4845.75	50.163	1620.72	1268.67	23637.7	5500.6	18319.5				3028.93	2498.12
	% monocytes		0.120353	0.10773	0.126529	0.103527	0.115312	0.123392	0.088015	0.0934465	0.0442722	0.122868	0.0993916	0.110828	0.0756914	0.0983063	0.100618	0.0940787	0.0722386	0.0936273	0.0853172	0.0821626					5-3	Murf2	mock		176250	51546.7	49967.9	12755.3	22488.2	6537.79	15950.4	97.5789	8749.57	2712.19	67294.4	15037.2	52665.1				7521.08	7578.63
	% lymphocytes		0.375664	0.455174	0.354804	0.375729	0.336449	0.363264	0.266237	0.264688	0.372657	0.270639	0.457317	0.371353	0.362131	0.47901	0.450764	0.48756	0.288107	0.311822	0.298809	0.333025					5-4	Murf2	mock		176250	40573.5	38860.9	9694.13	17868.9	6332.69	11536.2	103.169	5732.44	3547.13	72730.3	14481.2	58695.6				6599.06	7957.14
	MFI for AM's		584.82	623.3	522.57	604.83	493.2	614.09	155.98	135.74	157.44	153.65	584.06	523.78	554.5	502.13	588.13	652.08	163.54	135.97	123.98	131.45									No. of Cells
	Log MFI		2.76702	2.7947	2.71814	2.78163	2.69302	2.78823	2.19307	2.13271	2.19712	2.18653	2.76646	2.71915	2.7439	2.70082	2.76947	2.8143	2.21362	2.13344	2.09335	2.11876									Recovered	% LCA+, AF cells	% CD11c+ cells	% neutrophils	% SigLecF+ cells	% eosinophils	% AM's	% pDCs	% MoDCs	% CD11b hi DCs	% AF- cells	% monocytes	% lymphocytes	MFI for AM's	Log MFI	# total viable cells
	# total viable cells		206501	242560	214710	232210	64200	173926	189354	86381	233126	31481	176534	208855	200234	178422	137023	260569	49558	64415	70443	93960									2.60896e+06	431645	416872	80163.2	161959	123201	38757.9	584.14	107589	34778.1	1.29176e+06	305228	997295				197200	110277
	% Ly-6C low		0.0786388	0.0696859	0.0819338	0.0709229	0.0707632	0.0780964	0.059365	0.0488186	0.0292589	0.0724564	0.0569635	0.0694118	0.0480688	0.0522413	0.0566766	0.0609819	0.0386819	0.0515563	0.0426728	0.0374415									950625	161852	155939	32058.2	67729.5	28594.8	39134.7	313.104	30884.4	14341.9	374421	76246.6	300684				46961.7	29760.2
	%Ly-6C hi		0.042455	0.0389306	0.0455219	0.033418	0.0451869	0.0462266	0.0291201	0.0451835	0.0153908	0.0510784	0.0431135	0.0424361	0.0283418	0.0469897	0.0446202	0.0339104	0.0339804	0.0425212	0.0429993	0.0451469									2.41417e+06	389415	376637	88553.3	116088	88829.9	27258	419.197	113076	27497.7	1.15084e+06	222638	936761				138465	86193.9
	% viable cells	% LCA+, AF cells	% CD11c+ cells	% neutrophils	% SigLecF+ cells	% eosinophils	% AM's	% pDCs	% MoDCs	% CD11b hi DCs	% AF- cells	% monocytes	% lymphocytes	MFI for AM's	Log MFI	# total viable cells	% Ly-6C low	%Ly-6C hi													132188	32806	31729.6	7732.5	14930.7	4717.3	10213.4	87.03	4878.04	2373.97	51444.5	10876.7	40883.2				5423.55	5506.64
	0	0	0	0	0	0	0	0	0	0	0	0	0	0	0	0	0	0
	0.872324	0.164832	0.158832	0.0250556	0.0718592	0.0552394	0.0166198	0.000343824	0.031133	0.0167505	0.490903	0.120353	0.375664	584.82	2.76702	206501	0.0786388	0.042455													0.872775	0.826446	0.82947	0.849527	0.424707	0.455795	0.337	0.421402	0.928784	0.621183	0.796478	0.479719	0.890156				0.431209	0.579367
	0.889655	0.152338	0.145952	0.0312418	0.043313	0.0303224	0.0129906	0.000136049	0.0456176	0.0124258	0.558563	0.10773	0.455174	623.3	2.7947	242560	0.0696859	0.0389306
	0.847966	0.167663	0.162726	0.0337572	0.0587816	0.0457361	0.0130455	0.000209585	0.0451353	0.0123096	0.478026	0.126529	0.354804	522.57	2.71814	214710	0.0819338	0.0455219
	0.867018	0.135761	0.130468	0.020602	0.0579475	0.0420438	0.0159037	0.000249774	0.0323845	0.00956462	0.475953	0.103527	0.375729	604.83	2.78163	232210	0.0709229	0.033418
	0.818283	0.221526	0.214408	0.0352804	0.11595	0.0936916	0.0222586	0.00046729	0.0409034	0.0109813	0.447212	0.115312	0.336449	493.2	2.69302	64200	0.0707632	0.0451869
	0.843801	0.174172	0.168911	0.0344054	0.0624288	0.0481009	0.0143279	0.000172487	0.0437427	0.0160183	0.482199	0.123392	0.363264	614.09	2.78823	173926	0.0780964	0.0462266
	0.83675	0.139612	0.134204	0.0319666	0.0597769	0.0175597	0.0422172	0.000396084	0.0239129	0.00932117	0.351157	0.088015	0.266237	155.98	2.19307	189354	0.059365	0.0291201
	0.79794	0.28497	0.275593	0.07842	0.126336	0.0521179	0.0742177	0.00082194	0.0421157	0.0125143	0.355761	0.0934465	0.264688	135.74	2.13271	86381	0.0488186	0.0451835
	0.843513	0.143051	0.137913	0.0340288	0.0582775	0.0253511	0.0329264	0.000227345	0.02569	0.010282	0.41484	0.0442722	0.372657	157.44	2.19712	233126	0.0292589	0.0153908
	0.745819	0.19866	0.191226	0.0259204	0.0834154	0.03761	0.0458054	0.000349417	0.043423	0.0243957	0.390267	0.122868	0.270639	153.65	2.18653	31481	0.0724564	0.0510784
	0.887761	0.2115	0.206986	0.0518257	0.0858985	0.069675	0.0162235	0.000192597	0.0437819	0.0106948	0.551565	0.0993916	0.457317	584.06	2.76646	176534	0.0569635	0.0431135
	0.860225	0.180312	0.174102	0.0431687	0.0393718	0.0291159	0.0102559	0.000177156	0.0635321	0.0129803	0.478452	0.110828	0.371353	523.78	2.71915	208855	0.0694118	0.0424361
	0.870027	0.14551	0.14137	0.0314232	0.0505908	0.0405975	0.00999331	0.000169801	0.0378108	0.0100333	0.435216	0.0756914	0.362131	554.5	2.7439	200234	0.0480688	0.0283418
	0.89731	0.174418	0.165125	0.030809	0.0830111	0.0693524	0.0136586	0.000123303	0.0260394	0.00918048	0.568114	0.0983063	0.47901	502.13	2.70082	178422	0.0522413	0.0469897
	0.822961	0.151719	0.147136	0.0221204	0.0612306	0.0416353	0.0195953	0.000357604	0.037439	0.0164644	0.546748	0.100618	0.450764	588.13	2.76947	137023	0.0566766	0.0446202
	0.875315	0.146683	0.140404	0.0434165	0.0299882	0.0150747	0.0149135	9.97816e-05	0.0440344	0.0108608	0.578043	0.0940787	0.48756	652.08	2.8143	260569	0.0609819	0.0339104
	0.83066	0.217119	0.212398	0.05204	0.104161	0.0316397	0.0725211	0.000827313	0.0290165	0.0167481	0.358429	0.0722386	0.288107	163.54	2.21362	49558	0.0386819	0.0339804
	0.807651	0.231359	0.223535	0.0402701	0.121307	0.0388264	0.0824808	0.000853838	0.0275867	0.0215943	0.402344	0.0936273	0.311822	135.97	2.13344	64415	0.0515563	0.0425212
	0.798022	0.292463	0.283506	0.0723706	0.127593	0.0370938	0.0904987	0.000553639	0.049643	0.0153883	0.381812	0.0853172	0.298809	123.98	2.09335	70443	0.0426728	0.0429993
	0.802103	0.230204	0.220487	0.0550021	0.101384	0.0359302	0.0654534	0.000585355	0.0325245	0.0201256	0.412654	0.0821626	0.333025	131.45	2.11876	93960	0.0374415	0.0451469

## Sheet: FACS lymphocyte panel
			l1	l2	l3	l4	l5	l6	l7	l8	l9	l10	l11	l12	l13	l14	l15	l16	l17	l18	l19	l20
		Gate	Count	Count	Count	Count	Count	Count	Count	Count	Count	Count	Count	Count	Count	Count	Count	Count	Count	Count	Count	Count
		Total	62966	75224	57348	53393	47562	61027	45514	32103	53796	48239	65501	59298	53900	66357	63538	608	17291	26048	36313	51392									% viable cells	% viable lc's	% LCA+ lc's	% T cells	% CD4 T cells	% CD8 T cells	% NK cells	% B cells	# viable cells
	T cells	R5	7762	9350	8137	9702	7264	10605	8198	8745	14688	8742	8833	6304	7995	12530	8610	472	5800	9030	10985	17815
																											1-1	B6	10^5		0.839926	0.587731	0.429172	0.0529053	0.0280544	0.0188324	0.0471595	0.197178	146715
		Total	227774	244372	222299	229242	196964	235169	178526	113814	188058	163255	246734	262930	252555	245994	215812	215530	75499	77206	105722	151972					1-2	B6	10^5		0.883787	0.567443	0.471541	0.0586104	0.0267539	0.0269733	0.0351913	0.275093	159528
	singlets	R1	174676	180505	174333	174453	150683	179731	146592	98362	152698	136528	177727	185137	184842	179476	159212	191575	65283	66549	92933	129857					1-3	B6	10^5		0.850711	0.533596	0.386684	0.0548659	0.0242268	0.026344	0.044327	0.193801	148307
																											1-4	B6	10^5		0.847478	0.496811	0.361142	0.0656228	0.0286381	0.0322162	0.0383307	0.187981	147845
		Total	62966	75224	57348	53393	47562	61027	45514	32103	53796	48239	65501	59298	53900	66357	63538	608	17291	26048	36313	51392					1-5	B6	10^5		0.887233	0.452401	0.355761	0.0543342	0.0251176	0.0234795	0.0424786	0.16482	133691
	NK cells	R8	6919	5614	6574	5667	5679	6971	4126	3718	2082	6295	6159	6223	4329	4952	6817	122	1563	2708	2892	4514					2-1	B6	10^5		0.835821	0.565646	0.406243	0.070595	0.0326714	0.032079	0.0464043	0.179087	150223
																											2-2	B6	mock		0.850381	0.591052	0.365108	0.0657634	0.0328817	0.0287264	0.0330983	0.188193	124659
		Total	7762	9350	8137	9702	7264	10605	8198	8745	14688	8742	8833	6304	7995	12530	8610	472	5800	9030	10985	17815					2-3	B6	mock		0.792786	0.607951	0.411682	0.112144	0.0581431	0.0469864	0.0476789	0.123224	77980
	CD4 T cells	R6	4116	4268	3593	4234	3358	4908	4099	4534	6529	4213	3824	2979	3711	6353	4493	437	3397	5209	5716	9899					2-4	B6	mock		0.862107	0.577954	0.408654	0.111575	0.0495966	0.0565017	0.0158156	0.195439	131642
	CD8 T cells	R7	2763	4303	3907	4763	3139	4819	3581	3664	7438	3546	3618	2589	3241	4870	3008	9	2014	3286	4582	6929					2-5	B6	mock		0.815752	0.617546	0.43313	0.078493	0.0378278	0.031839	0.0565218	0.203272	111373
																											3-1	Murf2	10^5		0.864162	0.546075	0.42648	0.0575121	0.0248983	0.023557	0.0401016	0.129694	153585
		Total	174676	180505	174333	174453	150683	179731	146592	98362	152698	136528	177727	185137	184842	179476	159212	191575	65283	66549	92933	129857					3-2	Murf2	10^5		0.878231	0.474897	0.364702	0.0387717	0.0183218	0.0159232	0.0382735	0.140892	162593
	total viable cells	R2	146715	159528	148307	147845	133691	150223	124659	77980	131642	111373	153585	162593	162383	163450	136401	180491	53549	54270	75673	106405					3-3	Murf2	10^5		0.878496	0.468085	0.331931	0.0492354	0.0228534	0.019959	0.0266592	0.146321	162383
	viable lc's	R3	86229	90523	79136	73451	60482	84973	73680	47408	76083	68778	83869	77215	76009	80556	78165	106955	33255	36108	49553	70014					4-1	Murf2	10^5		0.910707	0.492848	0.405977	0.0766595	0.0388682	0.029795	0.0302967	0.195546	163450
																											4-2	Murf2	10^5		0.856726	0.573053	0.465818	0.0631227	0.0329396	0.0220526	0.0499776	0.198437	136401
		Total	86229	90523	79136	73451	60482	84973	73680	47408	76083	68778	83869	77215	76009	80556	78165	106955	33255	36108	49553	70014					4-3	Murf2	10^5		0.942143	0.592578	0.00336859	0.00261509	0.00242117	4.9864e-05	0.000675934	5.54044e-05	180491
	LCA+ lc's	R4	62966	75224	57348	53393	47562	61027	45514	32103	53796	48239	65501	59298	53900	66357	63538	608	17291	26048	36313	51392					5-1	Murf2	mock
																											5-2	Murf2	mock		0.815489	0.66534	0.479971	0.16639	0.095983	0.0605491	0.0498987	0.135747	54270
		Total	62966	75224	57348	53393	47562	61027	45514	32103	53796	48239	65501	59298	53900	66357	63538	608	17291	26048	36313	51392					5-3	Murf2	mock		0.814275	0.654831	0.479867	0.145164	0.0755355	0.06055	0.0382171	0.1419	75673
	B cells	R9	28929	43885	28742	27792	22035	26903	23460	9609	25728	22639	19919	22908	23760	31962	27067	10	5219	7367	10738	16113					5-4	Murf2	mock		0.819401	0.657995	0.482985	0.167426	0.0930313	0.0651191	0.0424228	0.151431	106405
																															% viable cells	% viable lc's	% LCA+ lc's	% T cells	% CD4 T cells	% CD8 T cells	% NK cells	% B cells
																														B6 inf	0.857493	0.533938	0.401757	0.0594889	0.027577	0.0266541	0.0423152	0.19966
	% viable cells		0.839926	0.883787	0.850711	0.847478	0.887233	0.835821	0.850381	0.792786	0.862107	0.815752	0.864162	0.878231	0.878496	0.910707	0.856726	0.942143	0.820259	0.815489	0.814275	0.819401								B6 mock	0.830256	0.598626	0.404644	0.091994	0.0446123	0.0410134	0.0382786	0.177532
	% viable lc's		0.587731	0.567443	0.533596	0.496811	0.452401	0.565646	0.591052	0.607951	0.577954	0.617546	0.546075	0.474897	0.468085	0.492848	0.573053	0.592578	0.62102	0.66534	0.654831	0.657995								Murf2 inf	0.888411	0.524589	0.333046	0.0479861	0.0233837	0.0185561	0.0309974	0.135157
	% LCA+ lc's		0.429172	0.471541	0.386684	0.361142	0.355761	0.406243	0.365108	0.411682	0.408654	0.43313	0.42648	0.364702	0.331931	0.405977	0.465818	0.00336859	0.322901	0.479971	0.479867	0.482985								Murf2 mock	0.816388	0.659389	0.480941	0.15966	0.0881833	0.0620727	0.0435128	0.143026
	% T cells		0.0529053	0.0586104	0.0548659	0.0656228	0.0543342	0.070595	0.0657634	0.112144	0.111575	0.078493	0.0575121	0.0387717	0.0492354	0.0766595	0.0631227	0.00261509	0.108312	0.16639	0.145164	0.167426
	% CD4 T cells		0.0280544	0.0267539	0.0242268	0.0286381	0.0251176	0.0326714	0.0328817	0.0581431	0.0495966	0.0378278	0.0248983	0.0183218	0.0228534	0.0388682	0.0329396	0.00242117	0.0634372	0.095983	0.0755355	0.0930313									0.0856278	0.762379	0.372221	0.331973	0.461532	0.122335	0.167897	0.0916998
	% CD8 T cells		0.0188324	0.0269733	0.026344	0.0322162	0.0234795	0.032079	0.0287264	0.0469864	0.0565017	0.031839	0.023557	0.0159232	0.019959	0.029795	0.0220526	4.9864e-05	0.0376104	0.0605491	0.06055	0.0651191
	% NK cells		0.0471595	0.0351913	0.044327	0.0383307	0.0424786	0.0464043	0.0330983	0.0476789	0.0158156	0.0565218	0.0401016	0.0382735	0.0266592	0.0302967	0.0499776	0.000675934	0.0291882	0.0498987	0.0382171	0.0424228
	% B cells		0.197178	0.275093	0.193801	0.187981	0.16482	0.179087	0.188193	0.123224	0.195439	0.203272	0.129694	0.140892	0.146321	0.195546	0.198437	5.54044e-05	0.0974621	0.135747	0.1419	0.151431
	# viable cells		146715	159528	148307	147845	133691	150223	124659	77980	131642	111373	153585	162593	162383	163450	136401	180491	53549	54270	75673	106405
																																# viable lc's	# LCA+ lc's	# T cells	# CD4 T cells	# CD8 T cells	# NK cells	# B cells
																											1-1	B6	10^5		1738750	1.02192e+06	746223	91989.1	48779.6	32744.9	81998.5	342844
																											1-2	B6	10^5		3336250	1.89313e+06	1.57318e+06	195539	89257.8	89989.7	117407	917778
																											1-3	B6	10^5		3105000	1.65682e+06	1.20065e+06	170359	75224.1	81798.1	137635	601751
																											1-4	B6	10^5		2158750	1.07249e+06	779615	141663	61822.5	69546.7	82746.4	405803
																											1-5	B6	10^5		1175000	531572	418019	63842.7	29513.2	27588.4	49912.3	193664
	% viable cells	% viable lc's	% LCA+ lc's	% T cells	% CD4 T cells	% CD8 T cells	% NK cells	% B cells	# viable cells																		2-1	B6	10^5		4140000	2.34177e+06	1.68184e+06	292264	135260	132807	192114	741421
	0.839926	0.587731	0.429172	0.0529053	0.0280544	0.0188324	0.0471595	0.197178	146715																		2-2	B6	mock		535000	316213	195333	35183.4	17591.7	15368.6	17707.6	100683
	0.883787	0.567443	0.471541	0.0586104	0.0267539	0.0269733	0.0351913	0.275093	159528																		2-3	B6	mock		235000	142868	96745.4	26353.9	13663.6	11041.8	11204.5	28957.6
	0.850711	0.533596	0.386684	0.0548659	0.0242268	0.026344	0.044327	0.193801	148307																		2-4	B6	mock		1738750	1.00492e+06	710547	194002	86236.1	98242.4	27499.4	339820
	0.847478	0.496811	0.361142	0.0656228	0.0286381	0.0322162	0.0383307	0.187981	147845																		2-5	B6	mock		1293750	798951	560362	101550	48939.8	41191.6	73125.1	262983
	0.887233	0.452401	0.355761	0.0543342	0.0251176	0.0234795	0.0424786	0.16482	133691																		3-1	Murf2	10^5		470000	256655	200446	27030.7	11702.2	11071.8	18847.7	60956
	0.835821	0.565646	0.406243	0.070595	0.0326714	0.032079	0.0464043	0.179087	150223																		3-2	Murf2	10^5		4988750	2.36914e+06	1.81941e+06	193422	91403	79436.8	190937	702873
	0.850381	0.591052	0.365108	0.0657634	0.0328817	0.0287264	0.0330983	0.188193	124659																		3-3	Murf2	10^5		6523750	3.05367e+06	2.16544e+06	321200	149090	130207	173918	954560
	0.792786	0.607951	0.411682	0.112144	0.0581431	0.0469864	0.0476789	0.123224	77980																		4-1	Murf2	10^5		646250	318503	262363	49541.2	25118.5	19255	19579.3	126372
	0.862107	0.577954	0.408654	0.111575	0.0495966	0.0565017	0.0158156	0.195439	131642																		4-2	Murf2	10^5		652500	373917	303946	41187.6	21493.1	14389.3	32610.4	129480
	0.815752	0.617546	0.43313	0.078493	0.0378278	0.031839	0.0565218	0.203272	111373																		4-3	Murf2	10^5		1203750	713316	4054.94	3147.91	2914.49	60.0238	813.656	66.6931
	0.864162	0.546075	0.42648	0.0575121	0.0248983	0.023557	0.0401016	0.129694	153585																		5-1	Murf2	mock		117500	0	0	0	0	0	0	0
	0.878231	0.474897	0.364702	0.0387717	0.0183218	0.0159232	0.0382735	0.140892	162593																		5-2	Murf2	mock		58750	39088.7	28198.3	9775.43	5639	3557.26	2931.55	7975.15
	0.878496	0.468085	0.331931	0.0492354	0.0228534	0.019959	0.0266592	0.146321	162383																		5-3	Murf2	mock		176250	115414	84576.6	25585.2	13313.1	10671.9	6735.76	25009.9
	0.910707	0.492848	0.405977	0.0766595	0.0388682	0.029795	0.0302967	0.195546	163450																		5-4	Murf2	mock		176250	115972	85126.1	29508.9	16396.8	11477.2	7477.02	26689.7
	0.856726	0.573053	0.465818	0.0631227	0.0329396	0.0220526	0.0499776	0.198437	136401
	0.942143	0.592578	0.00336859	0.00261509	0.00242117	4.9864e-05	0.000675934	5.54044e-05	180491
	0.820259	0.62102	0.322901	0.108312	0.0634372	0.0376104	0.0291882	0.0974621	53549																							1.41962e+06	1.06659e+06	159276	73309.5	72412.5	110302	533877
	0.815489	0.66534	0.479971	0.16639	0.095983	0.0605491	0.0498987	0.135747	54270																							565737	390747	89272.3	41607.8	41461.1	32384.1	183111
	0.814275	0.654831	0.479867	0.145164	0.0755355	0.06055	0.0382171	0.1419	75673																							1.18087e+06	792609	105922	50286.8	42403.4	72784.3	329051
	0.819401	0.657995	0.482985	0.167426	0.0930313	0.0651191	0.0424228	0.151431	106405																							67618.6	49475.2	16217.4	8837.23	6426.61	4286.08	14918.7
																																0.684245	0.547657	0.404733	0.432274	0.282938	0.382039	0.32453
